# Supplementary material
Source: publisher site journal article supplement (https://www.dovepress.com/get_supplementary_file.php?f=392875.docx)
Supplement: Supplementary file 1 [file get_supplementary_file.php]

**Appendix**

**Interview Guide**

Q1- In general, how do you describe your academic experience in the program?

Q2- In general, what are the different attributes that the graduates of program required?

Q3- In your opinion, how these mentioned attributes are achieved in your program?

Q4- In your opinion how the teaching-learning environment influences the development of students’ capabilities?

Q5- In your opinion, how the teacher should create a learning environment in class to make it easy to acquire?

Q6- Overall, what extent you are satisfied with the teaching learning environment in the program?

Q7- How you define active engagement?

Q8- Do you think that student’s active engagement and teacher student relationship is important in developing competence/capabilities/skills in students?

Q9- Based on your experience, what would you suggest to change in the program to improve students’ capabilities?
